# Supplementary material for: A 3D-assembled endohedral nitrogen fullerene in a metal–organic framework toward spin qubit and quantum sensors
Source: Royal Society of Chemistry journal article supplement (doi:10.1039/d4qi01782j), 2024-01-01
Supplement: d4qi01782j1.pdf [file d4qi01782j1.pdf]

## Supporting Information

### **3D-Assembled Endohedral Nitrogen Fullerene in Metal–Organic Framework toward Spin Qubit and Quantum Sensing**

Xin-Yu Hui<sup>‡</sup>, Yu-Shuang Zhang<sup>‡</sup>, Qi Xiong, Zhi-Rong Wu, Song Gao, Shen Zhou<sup>\*</sup>, and Shang-Da Jiang<sup>\*</sup>

# Contents

**SI 1: Synthesis and Characterization Methods**

**SI 2: Variable temperature cw-EPR spectrum of N@C<sub>60</sub> powder**

**SI 3: Simulations of EDFS spectrum of N@C<sub>60</sub> powder and N@C<sub>60</sub>@MOF-177 powder**

**SI 4:  $T_1$  measurements and simulations of N@C<sub>60</sub> powder and N@C<sub>60</sub>@MOF-177 powder**

**SI 5:  $T_m$  measurements and simulations of N@C<sub>60</sub> powder and N@C<sub>60</sub>@MOF-177 powder**

**SI 6: Rabi oscillations of N@C<sub>60</sub> powder and N@C<sub>60</sub>@MOF-177 powder**

**SI 7: EPR measurements conditions**

## SI 1: Synthesis and Characterization Methods

### Synthesis of MOF-177

MOF-177 was prepared based on the literature methods<sup>1,2</sup>. Powder X-ray diffraction (PXRD) data of MOF-177 (Supplementary Information Figure S1) showed a close match with the theoretical result, and the cell parameters of MOF-177 determined by the single crystal X-ray diffraction (a hexagonal crystal system with cell sizes of  $a = 36.797 \text{ \AA}$ ,  $b = 36.814 \text{ \AA}$ , and  $c = 29.796 \text{ \AA}$  at 153 K) were consistent with the previous report<sup>2</sup>.

### Synthesis of N@C<sub>60</sub>@MOF-177

Add 1 ml 1000 ppm N@C<sub>60</sub> solution of toluene to a sample flask containing 20 mg of MOF-177 crystals and then keep it for more than a week to ensure that N@C<sub>60</sub> can fully enter the MOF-177. After that, the MOF-177 crystals changed from colorless to purple, and the color of the solution became lighter.

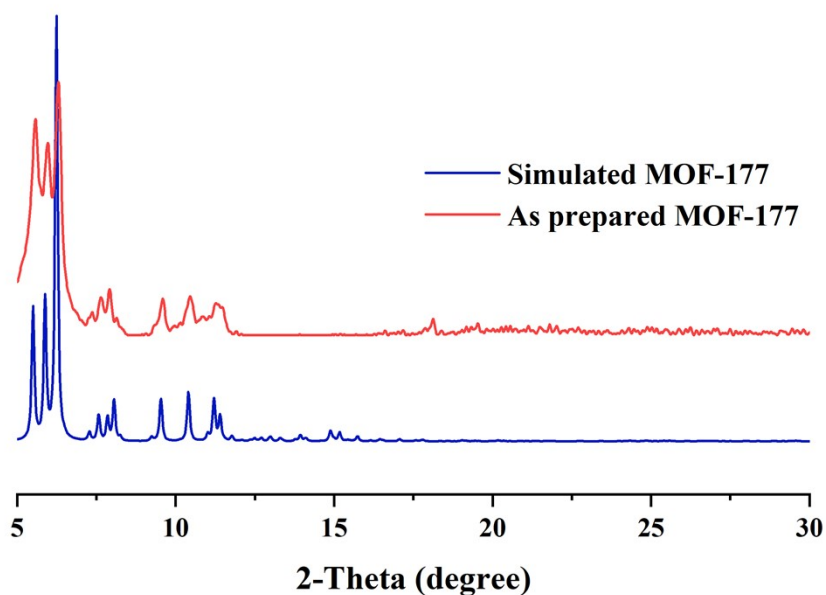

**Figure S1.** PXRD spectra of as-prepared MOF-177 (red) and the simulated spectra of MOF-177 (blue).

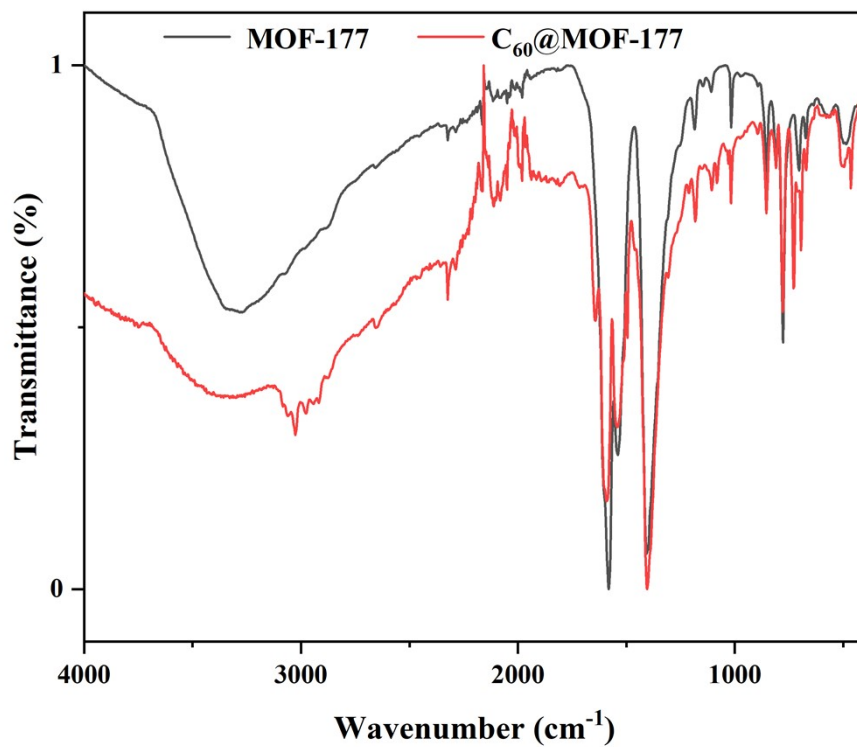

**Figure S2.** IR-ATR spectra of **MOF-177** powder (black) and **C<sub>60</sub>@MOF-177** powder (red).

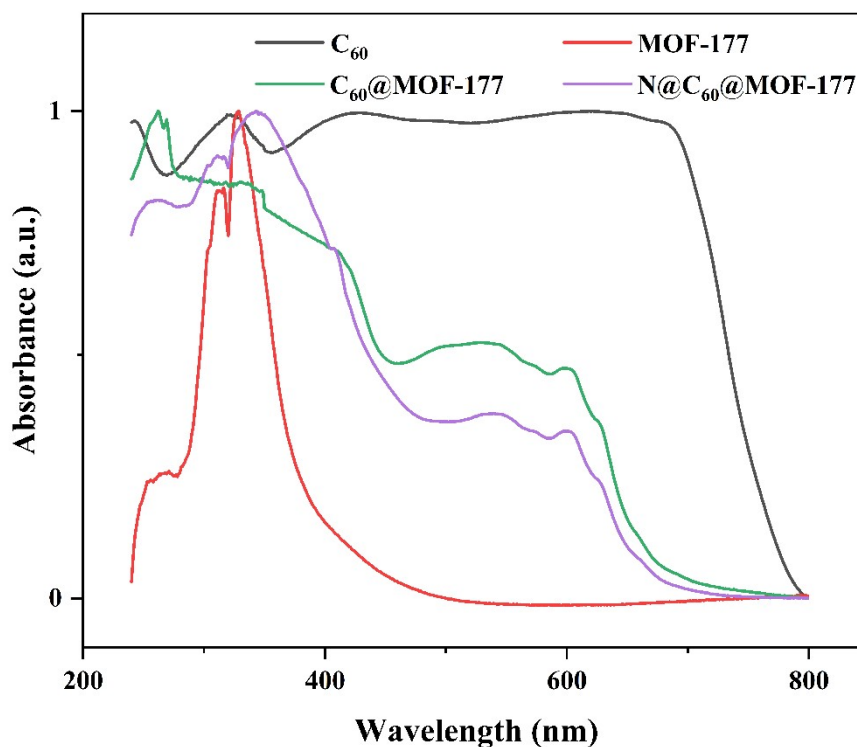

**Figure S3.** Solid-state Ultraviolet-visible spectra of **C<sub>60</sub>** powder (black), **MOF-177** powder (red), **C<sub>60</sub>@MOF-177** powder (green) and **N@C<sub>60</sub>@MOF-177** powder (purple).

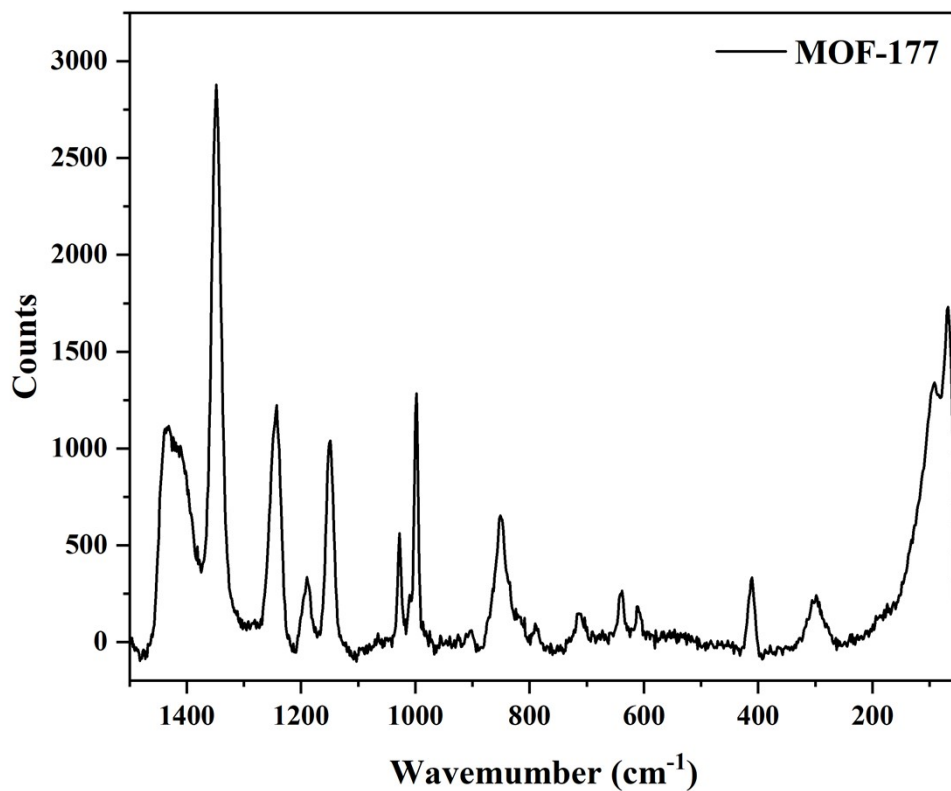

**Figure S4.** Raman spectra of MOF-177 powder.

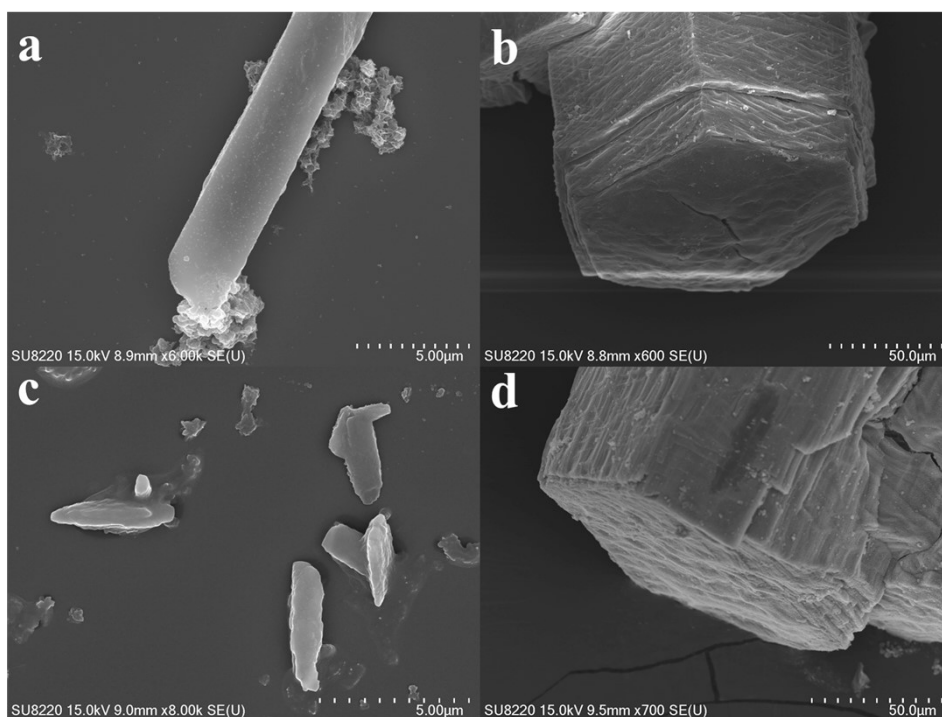

**Figure S5.** (a) SEM images of MOF-177 at 5 μs scale and (b) 50 μs scale. (c) SEM images of N@C<sub>60</sub>@MOF-177 at 5 μs scale and (d) 50 μs scale.

SI 2: Variable temperature cw-EPR spectrum of N@C<sub>60</sub> powder

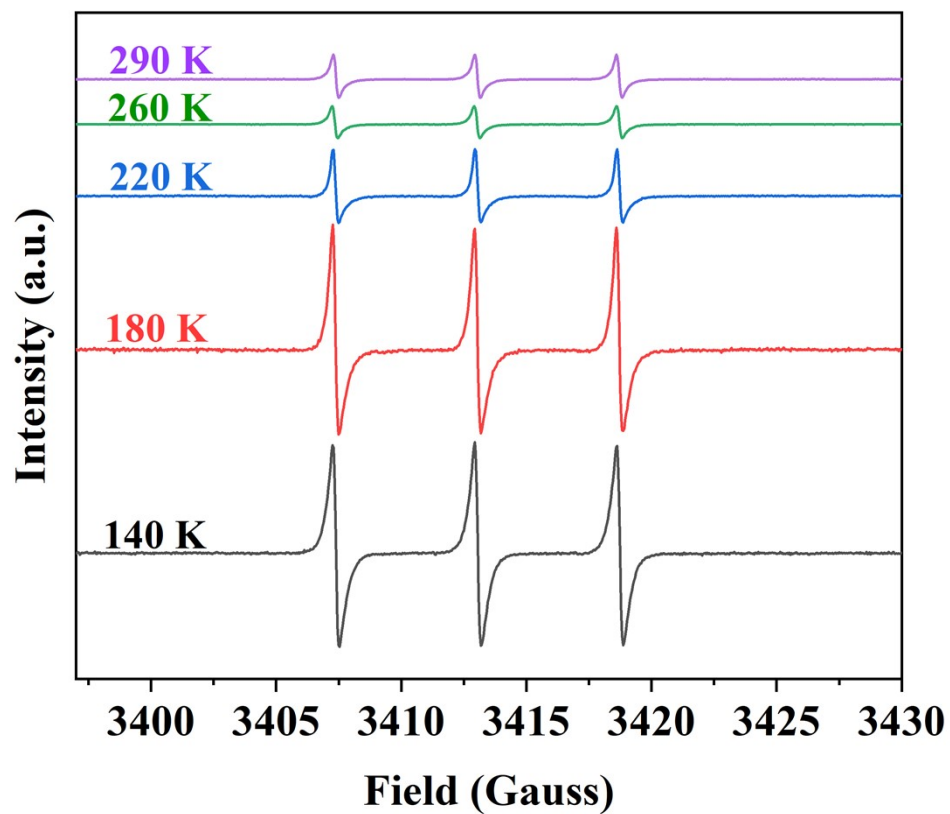

Figure S6. Variable temperature cw-EPR spectrum of N@C<sub>60</sub> powder.

SI 3: Simulations of EDFS spectrum of  $N@C_{60}$  powder and  $N@C_{60}@MOF-177$  powder

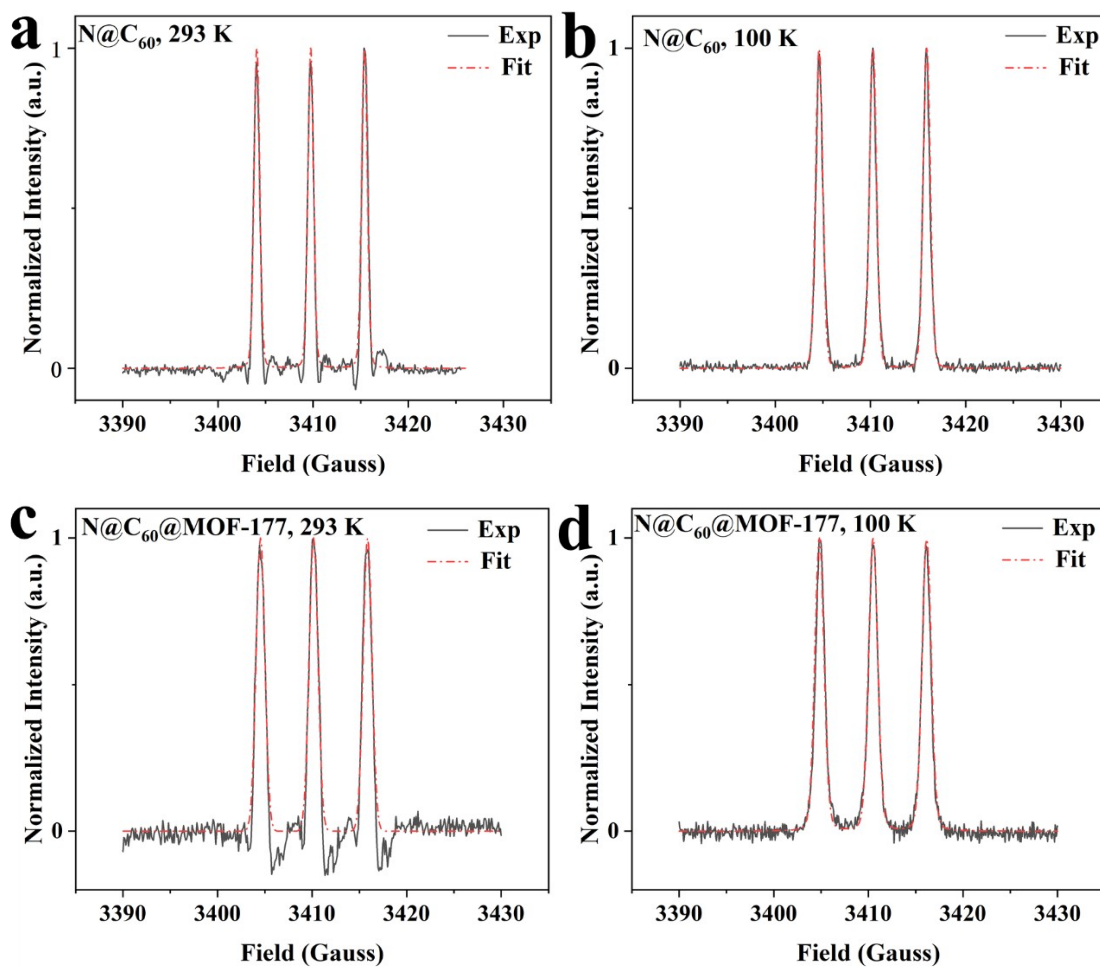

**Figure S7.** (a) Simulations of EDFS spectrum for  $N@C_{60}$  powder sample at 293 K and (b) 100 K. (c) Simulations of EDFS spectrum for  $N@C_{60}@MOF-177$  powder sample at 293 K and (d) 100 K.

SI 4:  $T_1$  measurements and simulations of  $N@C_{60}$  powder and  $N@C_{60}@MOF-177$  powder

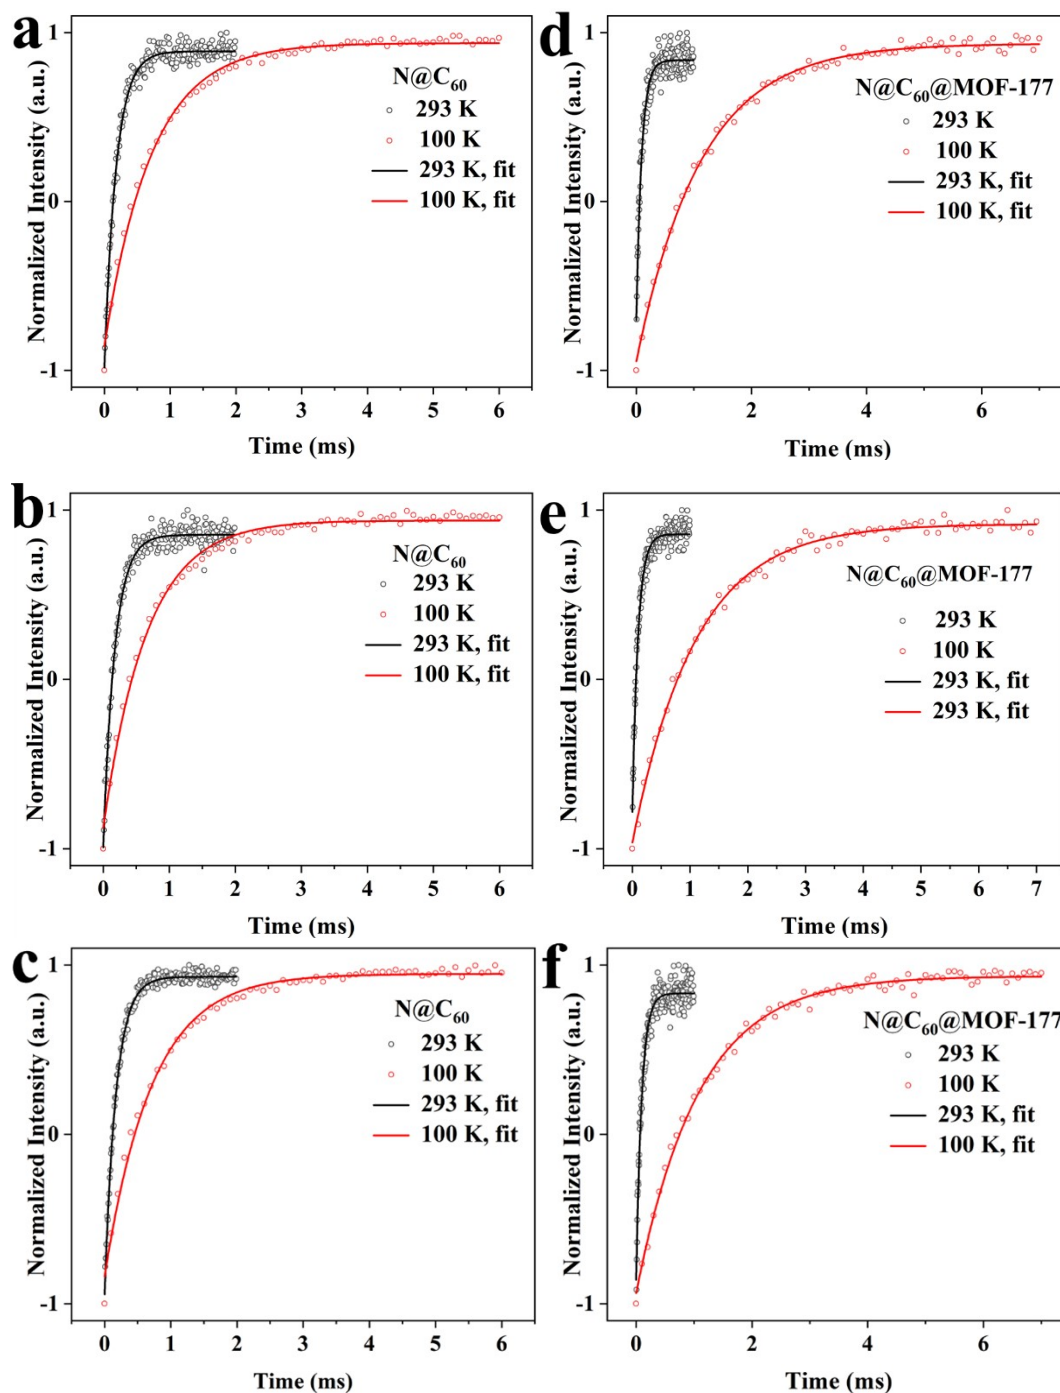

**Figure S8.** (a) Variable temperature  $T_1$  data and simulations of the  $N@C_{60}$  powder sample at the left peak (3404.8 G) (b) the central peak (3410.6 G) and (c) the right peak (3416.1 G). (d) Variable temperature  $T_1$  data and simulations of the  $N@C_{60}@MOF-177$  powder sample at the left peak (3404.8 G) (e) the central peak (3410.6 G) and (f) the right peak (3416.1 G).



All the inversion recovery data are fitted with a mono-exponential attenuation function in **Eq. S1**,

$$I(t) = I(0)\exp\left(-\frac{t}{T_1}\right) + C \#(Eq.S1)$$

| <b>N@C<sub>60</sub></b> powder         |                           |                            |                          |
|----------------------------------------|---------------------------|----------------------------|--------------------------|
| <i>T</i> / K                           | <i>T</i> <sub>1</sub> /ms |                            |                          |
|                                        | Left peak<br>(3404.8 G)   | Central peak<br>(3410.6 G) | Right peak<br>(3416.1 G) |
| 293 K                                  | 0.179(1)                  | 0.175(4)                   | 0.173(2)                 |
| 100 K                                  | 0.715(16)                 | 0.678(13)                  | 0.715(17)                |
| <b>N@C<sub>60</sub>@MOF-177</b> powder |                           |                            |                          |
| <i>T</i> / K                           | <i>T</i> <sub>1</sub> /ms |                            |                          |
|                                        | Left peak<br>(3404.8 G)   | Central peak<br>(3410.6 G) | Right peak<br>(3416.1 G) |
| 293 K                                  | 0.093(3)                  | 0.099(2)                   | 0.096(3)                 |
| 100 K                                  | 1.126(19)                 | 1.101(19)                  | 1.081(21)                |
| 10 K                                   | -                         | 22 (1)                     | -                        |

**Table S1.** Variable temperature *T*<sub>1</sub> values of **N@C<sub>60</sub>** and **N@C<sub>60</sub>@MOF-177** powder sample. All the *T*<sub>1</sub> values were obtained at the 9.56 GHz microwave frequency with the microwave power attenuation of 18 dB.

SI 5:  $T_m$  measurements and simulations of  $N@C_{60}$  powder and  $N@C_{60}@MOF-177$

powder

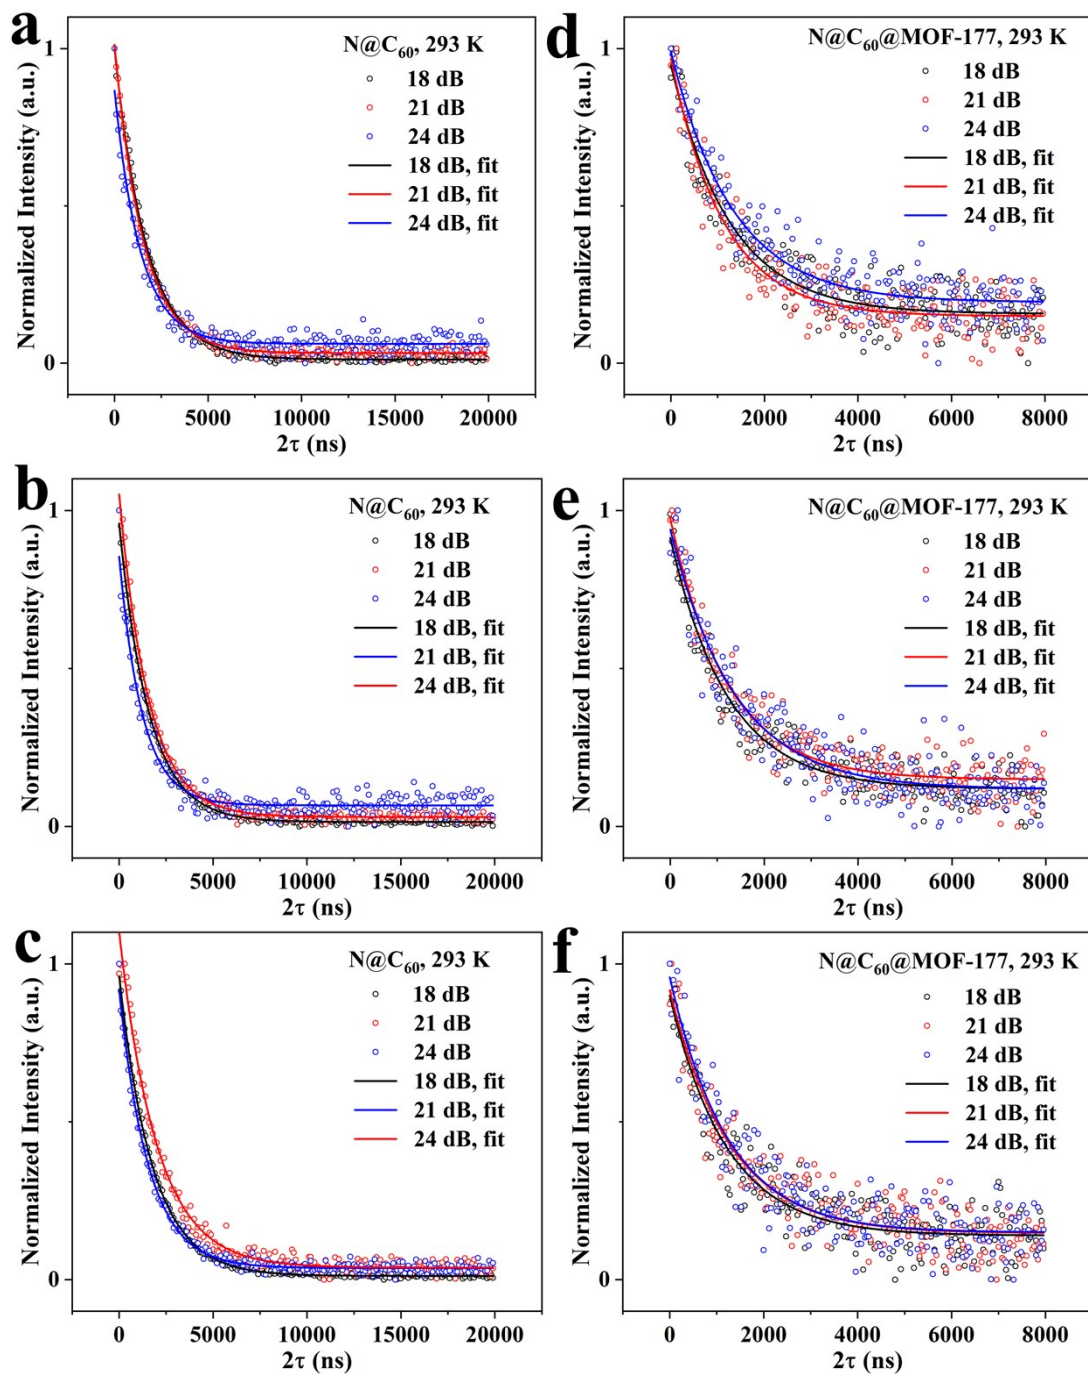

**Figure S9.** (a) Variable microwave power  $T_m$  data and simulations of the  $N@C_{60}$  powder sample at the left peak (3404.8 G) (b) the central peak (3410.6 G) and (c) the right peak (3416.1 G). (d) Variable microwave power  $T_m$  data and simulations of the  $N@C_{60}@MOF-177$  powder sample at the left peak (3404.8 G) (b) the central peak (3410.6 G) and (c) the right peak (3416.1 G).

All the Hahn-echo decay data are fitted with a mono-exponential attenuation function in Eq. S1.

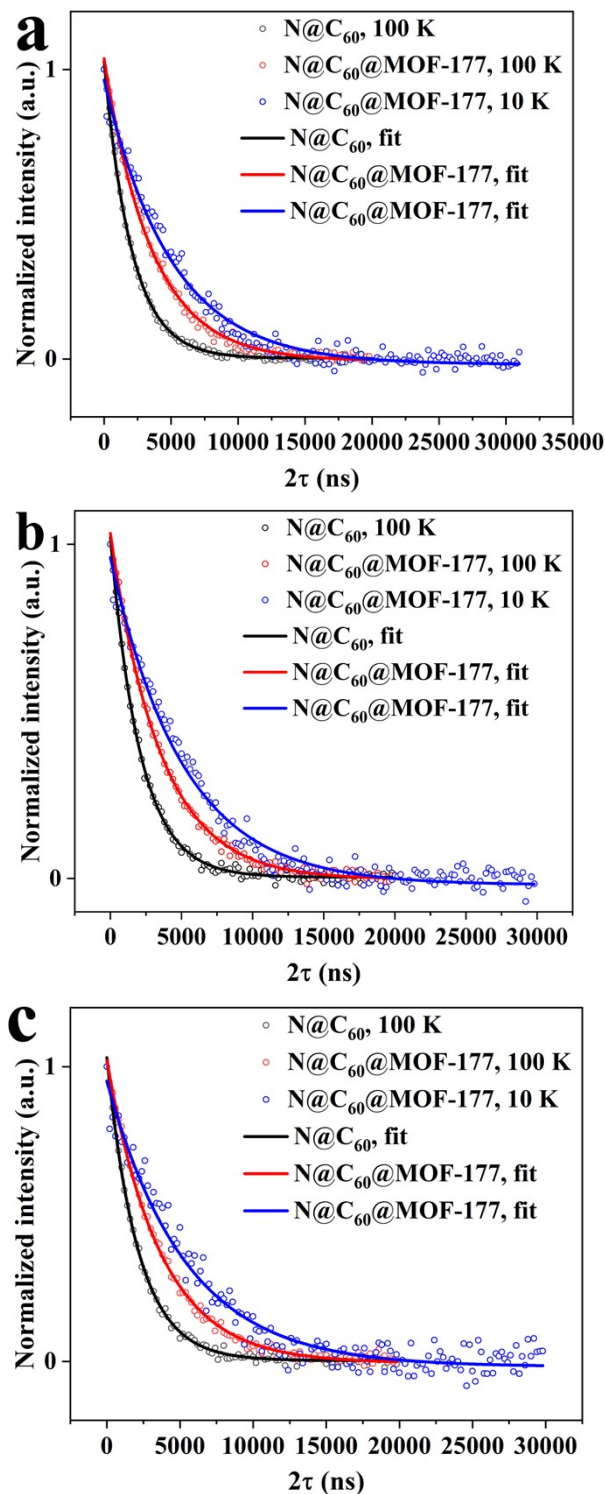

**Figure S10.** (a)  $T_m$  data and simulations of the N@C<sub>60</sub> powder sample and N@C<sub>60</sub>@MOF-177 powder sample at the left peak (3404.8 G) (b) the central peak (3410.6 G) and (c) the right peak (3416.1 G) at low temperature.

| <b>N@C<sub>60</sub> powder</b>         |                          |                            |                          |
|----------------------------------------|--------------------------|----------------------------|--------------------------|
| <i>T</i> / K                           | <i>T<sub>m</sub></i> /μs |                            |                          |
|                                        | Left peak<br>(3404.8 G)  | Central peak<br>(3410.6 G) | Right peak<br>(3416.1 G) |
| 293 K                                  | 1.700(16) <sup>a</sup>   | 1.586(11) <sup>a</sup>     | 1.773(9) <sup>a</sup>    |
|                                        | 1.532(15) <sup>b</sup>   | 1.569(17) <sup>b</sup>     | 1.997(32) <sup>b</sup>   |
|                                        | 1.383(40) <sup>c</sup>   | 1.238(41) <sup>c</sup>     | 1.568(21) <sup>c</sup>   |
| 100 K                                  | 2.042(17) <sup>a</sup>   | 2.092(1) <sup>a</sup>      | 2.122(23) <sup>a</sup>   |
| <b>N@C<sub>60</sub>@MOF-177 powder</b> |                          |                            |                          |
| <i>T</i> / K                           | <i>T<sub>m</sub></i> /μs |                            |                          |
|                                        | Left peak<br>(3404.8 G)  | Central peak<br>(3410.6 G) | Right peak<br>(3416.1 G) |
| 293 K                                  | 1.263(67) <sup>a</sup>   | 1.224(53) <sup>a</sup>     | 1.214(71) <sup>a</sup>   |
|                                        | 1.125(59) <sup>b</sup>   | 1.216(56) <sup>b</sup>     | 1.273(75) <sup>b</sup>   |
|                                        | 1.334(70) <sup>c</sup>   | 1.372(76) <sup>c</sup>     | 1.237(72) <sup>c</sup>   |
| 100 K                                  | 3.560(47) <sup>a</sup>   | 3.507(1) <sup>a</sup>      | 3.635(46) <sup>a</sup>   |
| 10 K                                   | 1.97(11) <sup>a</sup>    | 5.09(12) <sup>a</sup>      | 5.36(19) <sup>a</sup>    |

**Table S2.** Variable temperature and microwave power  $T_m$  values of N@C<sub>60</sub> powder sample and N@C<sub>60</sub>@MOF-177 powder sample. All the  $T_1$  values were obtained at the 9.56 GHz microwave frequency with the microwave power attenuation of <sup>a</sup> 24 dB, <sup>b</sup> 21 dB and <sup>c</sup>18 dB.

SI 6: Rabi oscillations of  $N@C_{60}$  powder and  $N@C_{60}@MOF-177$  powder

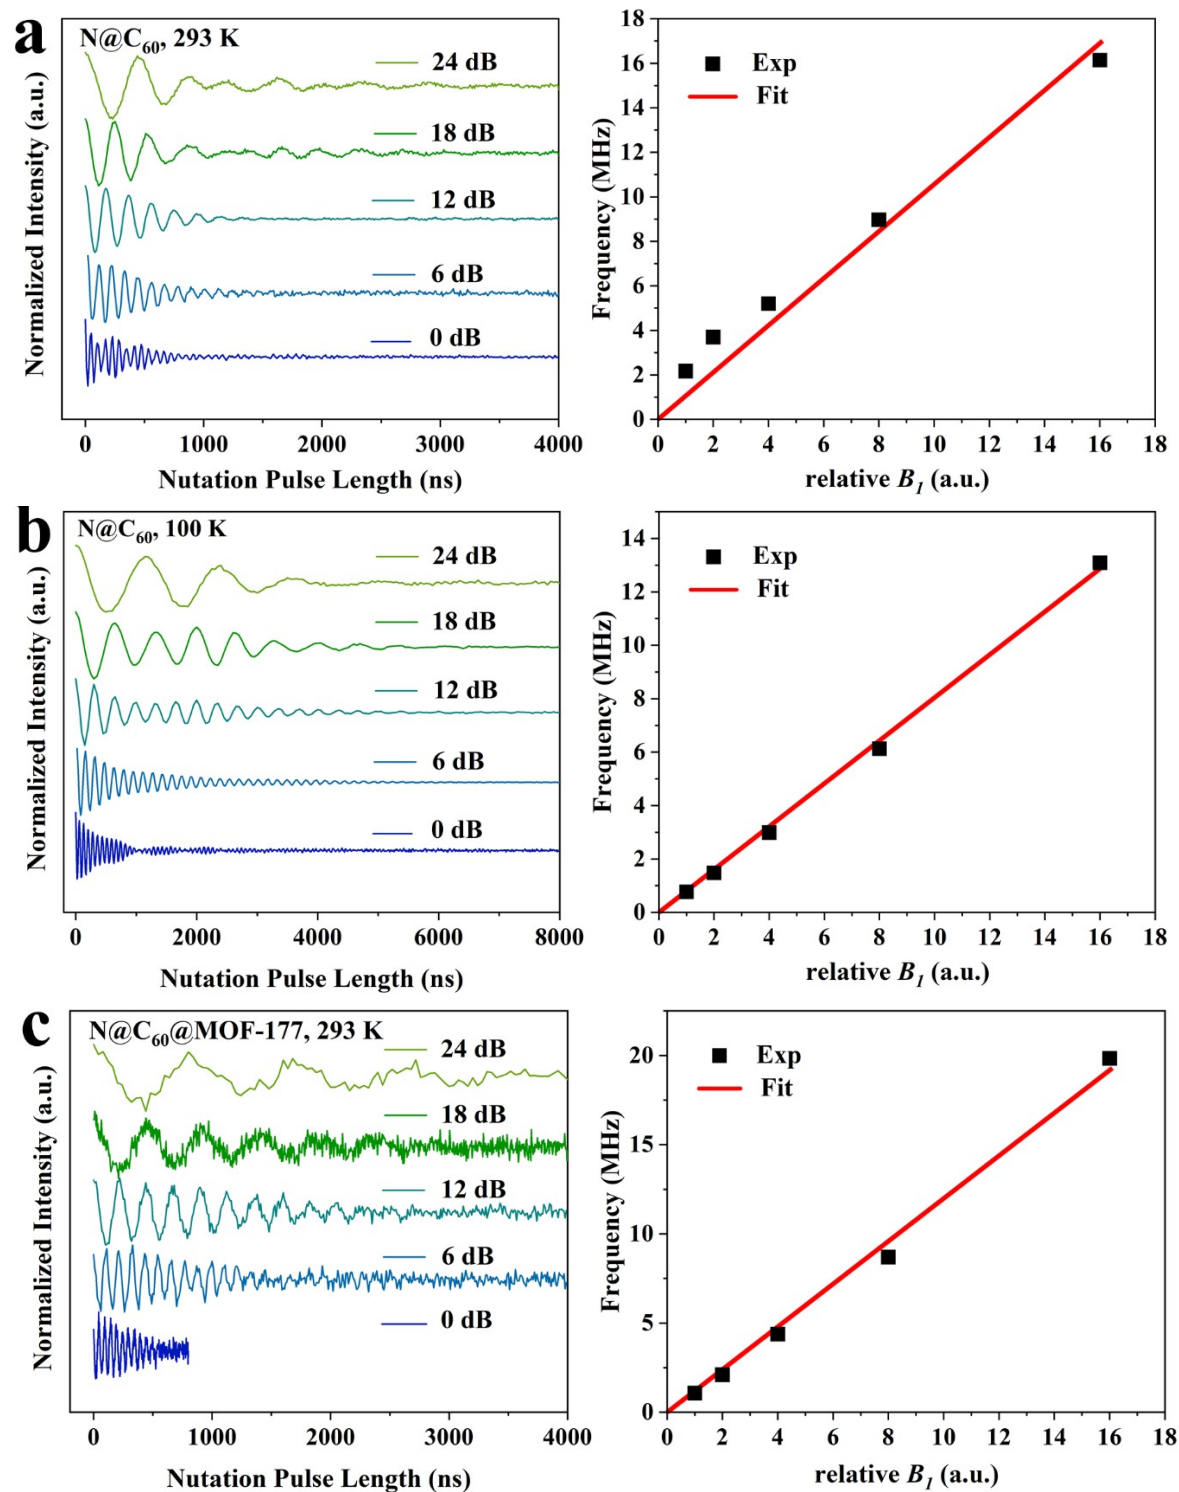

**Figure S11.** (a) Variable  $B_1$  Rabi oscillation data and the linear simulations of the fast Fourier Transform (FFT) results of  $N@C_{60}$  powder sample at 293 K, (b) 100 K and (c)  $N@C_{60}@MOF-177$  powder at 293 K.

## SI 7: EPR measurements conditions

Both of the cw- and pulsed-EPR data were measured on X-band Chinainstru&Quantumtech (Hefei) EPR100 spectrometer with a pulse-probe cavity (9.56 GHz). The low-temperature environment was achieved by liquid helium cryostats. The signal of the pulsed-EPR experiments was collected by integrating the Hahn-echo ( $\pi/2$ - $\tau$ - $\pi$ - $\tau$ -echo) with  $\tau = 400$  ns. The  $T_1$  values were measured by the inversion recovery method ( $\pi$ - $T$ - $\pi/2$ - $\tau$ - $\pi$ - $\tau$ -echo) with 2-step phase cycling. The  $T_m$  values were obtained by using the Hahn-echo sequence with 2-step phase cycling. The Rabi oscillations were obtained by nutation sequence ( $t_p$ - $T$ - $\pi/2$ - $\tau$ - $\pi$ - $\tau$ -echo), where  $t_p$  is the duration time of the nutation pulse and  $T$  is longer than  $5T_m$ . Two pulse (2p-) and three pulse (3p-) electron spin echo envelope modulation (ESEEM) experiments were carried out with the standard sequences ( $\pi/2$ - $\tau$ - $\pi$ - $\tau$ -echo) and ( $\pi/2$ - $\tau$ - $\pi/2$ - $T$ - $\pi/2$ - $\tau$ -echo). The  $\pi/2$  and  $\pi$  pulse lengths in EDFS,  $T_1$ , and  $T_m$  measurements were 120 and 240 ns with 18 dB attenuation of the microwave power 450 W, respectively. In nutation experiments, the  $\pi/2$  pulse lengths were adjusted to 20, 40, 80, 160, 320 ns by 0, 6, 12, 18, and 24 dB attenuation. In 2p- and 3p-ESEEM experiments, the  $\pi/2$  pulse lengths were set to 20 ns by 0 dB attenuation to collect the clear modulation signal of the  $^1\text{H}$  nuclear spin.

## Reference

- 1 Materials Design and Discovery Group, H. K. Chae, D. Y. Siberio-Pérez, J. Kim, Y. Go, M. Eddaoudi, A. J. Matzger, M. O’Keeffe and O. M. Yaghi, *Nature*, 2004, **427**, 523–527.
- 2 H. Meng, C. Zhao, Y. Li, M. Nie, C. Wang and T. Wang, *Nanoscale*, 2018, **10**, 3291–3298.
